# Supplementary material for: Enhanced trajectory tracking for quadrotors: disturbance observer state feedback control
Source: PeerJ journal article supplement (doi:10.7717/peerj-cs.1861), 2024-02-13
Supplement: matlab_code_and_data.zip [file matlab_code_and_data.zip]

## Sheet: Sheet1
Sampling instant	1	2	3	4	5	6	7	8	9	10	11	12	13	14	15	16	17	18	19	20	21	22	23	24	25	26	27	28	29	30	31	32	33	34	35	36	37	38	39	40	41	42	43	44	45	46	47	48	49
Reference X-axis coordinates	0.0499792	0.0998334	0.149438	0.198669	0.247404	0.29552	0.342898	0.389418	0.434966	0.479426	0.522687	0.564642	0.605186	0.644218	0.681639	0.717356	0.75128	0.783327	0.813416	0.841471	0.867423	0.891207	0.912764	0.932039	0.948985	0.963558	0.975723	0.98545	0.992713	0.997495	0.999784	0.999574	0.996865	0.991665	0.983986	0.973848	0.961275	0.9463	0.92896	0.909297	0.887362	0.863209	0.836899	0.808496	0.778073	0.745705	0.711473	0.675463	0.637765
Reference Y-axis coordinates	0.99875	0.995004	0.988771	0.980067	0.968912	0.955336	0.939373	0.921061	0.900447	0.877583	0.852525	0.825336	0.796084	0.764842	0.731689	0.696707	0.659983	0.62161	0.581683	0.540302	0.497571	0.453596	0.408487	0.362358	0.315322	0.267499	0.219007	0.169967	0.120503	0.0707372	0.0207948	-0.0291995	-0.0791209	-0.128844	-0.178246	-0.227202	-0.27559	-0.32329	-0.370181	-0.416147	-0.461073	-0.504846	-0.547358	-0.588501	-0.628174	-0.666276	-0.702713	-0.737394	-0.770231
Reference Z-axis coordinates	0.1	0.2	0.3	0.4	0.5	0.6	0.7	0.8	0.9	1	1.1	1.2	1.3	1.4	1.5	1.6	1.7	1.8	1.9	2	2.1	2.2	2.3	2.4	2.5	2.6	2.7	2.8	2.9	3	3.1	3.2	3.3	3.4	3.5	3.6	3.7	3.8	3.9	4	4.1	4.2	4.3	4.4	4.5	4.6	4.7	4.8	4.9
Simulated X-axis coordinates	0	0	0.0151366	0.0628847	0.140421	0.235603	0.335409	0.429666	0.512078	0.579822	0.63277	0.672635	0.70211	0.724291	0.742121	0.75806	0.773946	0.790953	0.809638	0.830027	0.851755	0.874205	0.896599	0.918144	0.938151	0.956031	0.971293	0.983594	0.99278	0.99884	1.00184	1.00186	0.99902	0.993425	0.985217	0.974517	0.961392	0.945846	0.927905	0.907645	0.885156	0.860576	0.83405	0.805663	0.775485	0.743556	0.709856	0.674358	0.637058
Simulated Y-axis coordinates	0	0	0.00881775	0.0368839	0.0848826	0.150064	0.228651	0.316749	0.410689	0.507145	0.603169	0.696197	0.784032	0.864833	0.937088	0.999597	1.05145	1.09199	1.12083	1.13777	1.14283	1.1362	1.11822	1.08935	1.0502	1.00142	0.943787	0.878102	0.805225	0.726039	0.641444	0.552343	0.459629	0.364179	0.266846	0.168445	0.0697565	-0.0284889	-0.125606	-0.220962	-0.313976	-0.404123	-0.490932	-0.573989	-0.652934	-0.727462	-0.797321	-0.862306	-0.922265
Simulated Z-axis coordinates	0	0	0.0306803	0.127537	0.285112	0.479237	0.684085	0.879605	1.05347	1.2003	1.32009	1.41646	1.49496	1.56188	1.62321	1.68398	1.74802	1.81782	1.89468	1.97882	2.06972	2.16634	2.26732	2.37128	2.47694	2.58323	2.68929	2.7945	2.89857	3.00142	3.10314	3.20389	3.30386	3.40326	3.50234	3.60129	3.70022	3.79918	3.89817	3.99727	4.0965	4.19596	4.2957	4.39574	4.49605	4.59658	4.69722	4.79783	4.89832
[truncated: 851 more columns]
